# Supplementary material for: Rational regulation of transition metals in polyoxometalate hybrids without noble metal assistance for efficient light-driven H2 production
Source: Royal Society of Chemistry journal article supplement (doi:10.1039/d0cc00846j), 2020-01-01
Supplement: d0cc00846j1.pdf [file d0cc00846j1.pdf]

# **Rational Regulation of Transition Metals in Polyoxometalate Hybrids without Noble-Metal Assistant for Efficient Light- Driven H<sub>2</sub> Production<sup>†</sup>**

Bonan Li,<sup>a†</sup> Xiaojing Yu,<sup>a†</sup> Haijun Pang,<sup>a\*</sup> Qingbo Shen,<sup>a</sup> Yan Hou,<sup>a</sup> Huiyuan Ma<sup>a\*</sup>  
and Jianjiao Xin<sup>a</sup>

<sup>a</sup>School of Materials Science and Engineering, College of Chemical and  
Environmental Engineering, Harbin University of Science and Technology, Harbin,  
150040, P. R. China

\*E-mail: [panghj116@163.com](mailto:panghj116@163.com), Tel./fax.: 86-0451-86688575.

\*E-mail: [mahy017@163.com](mailto:mahy017@163.com), Tel./fax: 86-0451-86392716.

# Table of contents

## Section 1 Experimental Section

|                                                                                                                                                                                                        |                |
|--------------------------------------------------------------------------------------------------------------------------------------------------------------------------------------------------------|----------------|
| I. Materials and General Methods                                                                                                                                                                       | Page S3        |
| II. Synthesis of $\text{Co}^{\text{II/III}}_2\text{-SiW}_{12}$ , $\text{Fe}^{\text{II/III}}_2\text{-SiW}_{12}$ , $\text{Zn}^{\text{II}}_2\text{-SiW}_{12}$ , $\text{Cd}^{\text{II}}_2\text{-SiW}_{12}$ | Page S4        |
| III. X-ray Crystallography including Table S1 and Fig. S1                                                                                                                                              | Page S5 and S6 |
| IV. Additional control experiments on photocatalytic hydrogen production                                                                                                                               | Page S7        |
| V. The details on how to determine the CB positions of Co-pzta                                                                                                                                         | Page S7        |
| VI. Discussions on The IR, PXRD and XPS spectra of title compounds                                                                                                                                     | Page S7        |
| VII. Experimental process on photocatalytic hydrogen evolution                                                                                                                                         | Page S8        |

## Section 2 Supplementary structural figures and characterization information

|                |             |
|----------------|-------------|
| I. Fig. S2-S18 | Page S8-S12 |
|----------------|-------------|

## Section 3 Some detailed comparisons and summaries

|                                                                                   |          |
|-----------------------------------------------------------------------------------|----------|
| I. Table S2 Parallel experiments and optimum experimental conditions              | Page S16 |
| II. Table S3 Summary of $\text{H}_2$ evolution activity of typical photocatalysts | Page S17 |

|                   |          |
|-------------------|----------|
| <b>References</b> | Page S19 |
|-------------------|----------|

## Section 1 Experimental Section

### I. Materials and General Methods

All other reagents were purchased commercially and were used without further purification. The FT-IR spectra were recorded from KBr pellets in the range of 4000–400  $\text{cm}^{-1}$  with a Bruker OPTIK GmbH-Tensor II spectrometer. The powder X-ray diffraction (PXRD) data were collected on a Bruker OPTIK GmbH-Tensor II spectrometer at room temperature. Optical properties were also studied by diffuse reflectance UV-vis spectroscopy (Lambda 35 spectrometer), Photoluminescence spectrum (PL) (SPEX Fluorolog-3 spectrofluorometer). The X-ray photoelectron spectroscopy (XPS) measurements were implemented by a Thermo ESCALAB 250Xi spectrometer with monochromatic Al  $K\alpha$  radiation ( $h\nu = 1486.6$  eV). All XPS spectra were characterized with respect to the C 1s peak at 284.8 eV.

The electrochemical impedance spectra (EIS), Mott-schottky plot and photocurrent-time (I-T) profiles was recorded on the CHI660E electrochemical workstation with a standard three-electrode system with the photocatalyst-coated ITO as the working electrode, Pt plate as the counter electrode, and Ag/AgCl electrode as a reference electrode. A 500 W Xenon lamp was used as the light source during the measurement. A 0.25 M  $\text{Na}_2\text{SO}_4$  solution was used as the electrolyte. The as-synthesized samples (2 mg) were added into 1 mL ethanol and 10  $\mu\text{L}$  Nafion mixed solution, and the working electrodes were prepared by dropping the suspension (200  $\mu\text{L}$ ) onto an ITO glass substrate electrode surface and dried at room temperature.

## II. Synthesis of $\text{Co}^{\text{II/III}}_2\text{-SiW}_{12}$ , $\text{Fe}^{\text{II/III}}_2\text{-SiW}_{12}$ , $\text{Zn}^{\text{II}}_2\text{-SiW}_{12}$ and $\text{Cd}^{\text{II}}_2\text{-SiW}_{12}$

The mixture of  $\text{H}_4[\text{SiW}_{12}\text{O}_{40}] \cdot 12\text{H}_2\text{O}$  (320 mg, 0.096 mmol),  $\text{CoCl}_2 \cdot 6\text{H}_2\text{O}$  (160 mg, 0.672 mmol), pzta (40 mg, 0.272 mmol), and deionized water (12 mL) was intensively mixed for 90 min. Then, the mixture was loaded in a 23 mL hydrothermal reactor and heated at 160 °C for 72 h. The initial pH of the solution was 1.8 and adjusted to a final pH of 3.0 with 1M NaOH. After the autoclave was cooled to room temperature at 10 °C h<sup>-1</sup>, Orange block crystals (Fig. S1) of  $\text{Co}^{\text{II/III}}_2\text{-SiW}_{12}$  were obtained (65% yield based on W). The reproducibility of  $\text{Co}^{\text{II/III}}_2\text{-SiW}_{12}$  is good. Elemental analysis calcd (%) for  $\text{C}_{36}\text{H}_{38}\text{N}_{30}\text{O}_{40}\text{SiW}_{12}\text{Co}_2$  (3947.03): C, 11.15; H, 0.83; N, 10.83; Si, 0.72, Found: C, 11.20; H, 0.88; N, 10.61; Si, 0.80. The CCDC number: 1977766.

The synthetic procedure was similar to  $\text{Co}^{\text{II/III}}_2\text{-SiW}_{12}$ , except that the  $\text{CoCl}_2 \cdot 6\text{H}_2\text{O}$  was used instead of  $\text{FeCl}_3 \cdot 6\text{H}_2\text{O}$  (160 mg, 0.592 mmol),  $\text{ZnCl}_2$  (160 mg, 1.173 mmol) and ,  $\text{CdCl}_2 \cdot \text{H}_2\text{O}$  (160 mg, 0.700 mmol). The orange block crystals (Fig. S1) of  $\text{Fe}^{\text{II/III}}_2\text{-SiW}_{12}$  were isolated, washed with distilled water, and dried at room temperature (57% yield based on W). Elemental analyses Calcd for  $\text{C}_{36}\text{H}_{38}\text{Fe}_2\text{N}_{30}\text{O}_{44}\text{SiW}_{12}$  (3940.85): C, 10.99; H, 0.82; N, 10.68; Si, 0.71. Found: C, 10.92; H, 0.89; N, 10.56; Si, 0.83. The CCDC number: 1977770. The colorless fusiform crystals of  $\text{Zn}^{\text{II}}_2\text{-SiW}_{12}$  were isolated (Fig. S1), washed with distilled water, and dried at room temperature (55% yield based on W). Elemental analyses Calcd for  $\text{C}_{36}\text{H}_{38}\text{Zn}_2\text{N}_{30}\text{O}_{44}\text{SiW}_{12}$  (3959.92): C, 10.94; H, 0.82; N, 10.63; Si, 0.71. Found: C, 10.81; H, 0.75; N, 10.72; Si, 0.79. The CCDC number: 1977771. The colorless block

crystals of  $\text{Cd}^{\text{II}}_2\text{-SiW}_{12}$  were isolated (Fig. S1), washed with distilled water, and dried at room temperature (55% yield based on W). Elemental analyses Calcd for  $\text{C}_{36}\text{H}_{38}\text{Cd}_2\text{N}_{30}\text{O}_{44}\text{SiW}_{12}$  (4053.98): C, 10.85; H, 0.81; N, 10.55; Si, 0.71. Found: C, 10.90; H, 0.90; N, 10.62; Si, 0.79. The CCDC number: 1977772.

### III. X-ray Crystallography

Single crystal X-ray diffraction data collections of  $\text{Co}^{\text{II/III}}_2\text{-SiW}_{12}$ ,  $\text{Fe}^{\text{II/III}}_2\text{-SiW}_{12}$ ,  $\text{Zn}^{\text{II}}_2\text{-SiW}_{12}$  and  $\text{Cd}^{\text{II}}_2\text{-SiW}_{12}$  were performed using a Bruker Smart Apex CCD diffractometer with Mo-K $\alpha$  radiation ( $\lambda = 0.71073 \text{ \AA}$ ) at 296 K. Multi-scan absorption corrections were applied. The structure was solved by Direct Methods and refined by full-matrix least-squares on  $F_2$  using the SHELXTL 97 crystallographic software package. Anisotropic displacement parameters were used to refine all non-hydrogen atoms. The organic hydrogen atoms were generated geometrically. All H atoms on C atoms were fixed at the calculated positions. The H atoms on water molecules in title compounds cannot be found from the residual peaks and were directly included in the final molecular formula.

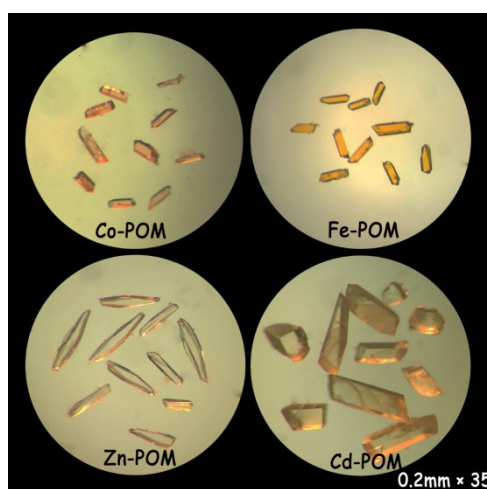

**Figure. S1.** The images of  $\text{Co}^{\text{II/III}}_2\text{-SiW}_{12}$ ,  $\text{Fe}^{\text{II/III}}_2\text{-SiW}_{12}$ ,  $\text{Zn}^{\text{II}}_2\text{-SiW}_{12}$  and  $\text{Cd}^{\text{II}}_2\text{-SiW}_{12}$  hybrids under an optical microscope (The magnification of optical microscope is  $0.25\text{mm} \times 35$ ).

**Table S1** Crystal data and structure refinements for title compounds.

| Compound                                                                   | Co <sup>II/III</sup> <sub>2</sub> -SiW <sub>12</sub>                                                 | Fe <sup>II/III</sup> <sub>2</sub> -SiW <sub>12</sub>                                                 | Zn <sup>II</sup> <sub>2</sub> -SiW <sub>12</sub>                                                     | Cd <sup>II</sup> <sub>2</sub> -SiW <sub>12</sub>                                                     |
|----------------------------------------------------------------------------|------------------------------------------------------------------------------------------------------|------------------------------------------------------------------------------------------------------|------------------------------------------------------------------------------------------------------|------------------------------------------------------------------------------------------------------|
| Formula                                                                    | C <sub>36</sub> H <sub>38</sub> Co <sub>2</sub> N <sub>30</sub> O <sub>44</sub><br>SiW <sub>12</sub> | C <sub>36</sub> H <sub>38</sub> Fe <sub>2</sub> N <sub>30</sub><br>O <sub>44</sub> SiW <sub>12</sub> | C <sub>36</sub> H <sub>38</sub> Zn <sub>2</sub> N <sub>30</sub> O <sub>44</sub><br>SiW <sub>12</sub> | C <sub>36</sub> H <sub>38</sub> Cd <sub>2</sub> N <sub>30</sub> O <sub>44</sub><br>SiW <sub>12</sub> |
| Formula weight                                                             | 3947.03                                                                                              | 3940.85                                                                                              | 3959.92                                                                                              | 4053.98                                                                                              |
| Crystal system                                                             | Monoclinic                                                                                           | Monoclinic                                                                                           | Monoclinic                                                                                           | Monoclinic                                                                                           |
| Space group                                                                | C2/c                                                                                                 | C2/c                                                                                                 | C2/c                                                                                                 | C2/c                                                                                                 |
| <i>a</i> /Å                                                                | 22.301(5)                                                                                            | 22.277(5)                                                                                            | 22.386(5)                                                                                            | 22.237(5)                                                                                            |
| <i>b</i> /Å                                                                | 20.140(5)                                                                                            | 20.082(5)                                                                                            | 19.981(5)                                                                                            | 20.176(5)                                                                                            |
| <i>c</i> /Å                                                                | 17.499(5)                                                                                            | 17.409(5)                                                                                            | 17.554(5)                                                                                            | 17.670(5)                                                                                            |
| <i>α</i> <sup>o</sup>                                                      | 90(5)                                                                                                | 90(5)                                                                                                | 90(5)                                                                                                | 90(5)                                                                                                |
| <i>β</i> <sup>o</sup>                                                      | 107.33(5)                                                                                            | 107.03(5)                                                                                            | 107.12(5)                                                                                            | 106.76(5)                                                                                            |
| <i>γ</i> <sup>o</sup>                                                      | 90(5)                                                                                                | 90(5)                                                                                                | 90(5)                                                                                                | 90(5)                                                                                                |
| <i>V</i> /Å <sup>3</sup>                                                   | 7503(3)                                                                                              | 7447(3)                                                                                              | 7504(3)                                                                                              | 7591(3)                                                                                              |
| <i>Z</i>                                                                   | 4                                                                                                    | 4                                                                                                    | 4                                                                                                    | 4                                                                                                    |
| <i>D</i> <sub>calcd</sub> /g cm <sup>-3</sup>                              | 3.487                                                                                                | 3.508                                                                                                | 3.498                                                                                                | 3.540                                                                                                |
| T/K                                                                        | 293(2)                                                                                               | 293(2)                                                                                               | 293(2)                                                                                               | 293(2)                                                                                               |
| <i>μ</i> /mm <sup>-1</sup>                                                 | 18.871                                                                                               | 18.958                                                                                               | 19.066                                                                                               | 18.776                                                                                               |
| Refl. Measured                                                             | 21779                                                                                                | 26749                                                                                                | 21255                                                                                                | 23917                                                                                                |
| Refl. Unique                                                               | 6884                                                                                                 | 9037                                                                                                 | 6612                                                                                                 | 9202                                                                                                 |
| <i>R</i> <sub>int</sub>                                                    | 0.0653                                                                                               | 0.0687                                                                                               | 0.0590                                                                                               | 0.0293                                                                                               |
| <i>F</i> (000)                                                             | 7056                                                                                                 | 7048                                                                                                 | 7080                                                                                                 | 7224                                                                                                 |
| GoF on <i>F</i> <sup>2</sup>                                               | 1.121                                                                                                | 1.001                                                                                                | 1.246                                                                                                | 1.046                                                                                                |
| <i>R</i> <sub>1</sub> / <i>wR</i> <sub>2</sub> [ <i>I</i> ≥2σ( <i>I</i> )] | 0.0576/0.1188                                                                                        | 0.0506/ 0.1053                                                                                       | 0.0673/0.1280                                                                                        | 0.0534/0.1288                                                                                        |

$$R_I = \sum \|F_o\| - \|F_c\| / \sum \|F_o\|, \quad wR_2 = \sum [w(F_o^2 - F_c^2)^2] / \sum [w(F_o^2)^2]^{1/2}$$

#### IV. Additional control experiments on photocatalytic hydrogen production of [M<sup>II</sup>(pzta)<sub>3</sub>]<sub>2</sub> and [M<sup>II</sup>(pzta)<sub>3</sub>][M<sup>III</sup>(pzta)<sub>3</sub>]

Because the Co<sup>II/III</sup><sub>2</sub>-SiW<sub>12</sub> has the best photocatalytic performance among all the title compounds, we have prepared a Co-pzta complex as an example in order to further compare the performance of photocatalytic hydrogen production between Co<sup>II/III</sup><sub>2</sub>-SiW<sub>12</sub> and Co-pzta coordination subunit. The Co-pzta complex was prepared by an identical synthesis method with the compound Co<sup>II/III</sup><sub>2</sub>-SiW<sub>12</sub>, except that the SiW<sub>12</sub> POMs had not been added into the reaction system. Consequently, instead of the single crystal, a powder sample with orange color was obtained. The powder sample can be confirmed as a Co-pzta complex. The powder contains cobalt cation, which could be confirmed by the orange color, because the single pzta ligand shows

white color (Fig. S16). Meanwhile, the powder contains pzta ligand, which could be confirmed by comparing IR spectra between the obtained powder and the single pzta ligand (Fig. S16). Then, the Co-pzta complex was used as a photocatalyst to measure the photocatalytic hydrogen production performance by the same experimental conditions as in the manuscript. As shown in Fig. S17, the Co-pzta complex and the parent POM (SiW<sub>12</sub>-TBA) displays a low photocatalytic H<sub>2</sub> production rate. While, the Co<sup>II/III</sup><sub>2</sub>-SiW<sub>12</sub> exhibits superb hydrogen production rates of *ca.* 12245.59 μmol g<sup>-1</sup> h<sup>-1</sup>.

#### V. The details on how to determine the CB positions of Co-pzta coordination subunits and POM

The CB positions of Co-pzta complex, SiW<sub>12</sub>-TBA POM and the Co<sup>II/III</sup><sub>2</sub>-SiW<sub>12</sub> photocatalyst are obtained through Mott-Schottky measurement. The typical experiment is listed as follows: before the test, a three-electrode system was constructed. The ITO coated with the photocatalyst was used as the working electrode, platinum wire was used as the counter electrode, Ag/AgCl was used as the reference electrode, and the electrolyte was 0.25M Na<sub>2</sub>SO<sub>4</sub> solution. Subsequently, the open circuit voltage was measured, and then the voltage sweep interval was set according to the open circuit voltage. Finally, the IMPE-Impedence-Potential program was used to measure the Mott-schottky curve of the photocatalyst at 1000 Hz. The intersection of the longest linear extension of the curve and the x-axis was the flat band potential of the sample. The CB positions of Co-pzta complex and SiW<sub>12</sub>-TBA POM are shown in Fig. S18.

#### VI. Discussions on the IR, PXRD and XPS spectra of title compounds.

Herein, we will describe the characterizations of Co<sup>II/III</sup><sub>2</sub>-SiW<sub>12</sub> as an example for concise because the four compounds are isomorphous. The characterizations of The IR spectrum shows the characteristic bands of an α-Keggin structure at 932, 880, 786 and 675 cm<sup>-1</sup> (Fig. S5), which can be assigned to to ν(Si-O<sub>c</sub>), ν(W=O<sub>t</sub>), ν<sub>as</sub>(W-O<sub>b</sub>-W) and ν<sub>as</sub>(W-O<sub>c</sub>-W),<sup>1</sup> respectively. Additionally, the absorbance peaks at 1638-1163 cm<sup>-1</sup> belong to organic ligand (pzta). The XRD diffraction peaks of both simulated and experimental patterns match well, which indicates that the phase purity

of the sample is good (Fig. S7). The X-ray photoelectron spectroscopy (XPS) measurements were also done in order to identify the chemical state of the elements and elemental composition of title compounds. The W4f signals fit perfectly to W in the oxidation state +VI. As shown in Fig. S8 and S9, the XPS high-resolution spectrum of the W4f of  $\text{Co}^{\text{II/III}}_2\text{-SiW}_{12}$  shows two main peaks 34.43 eV and 36.58 eV that are assigned to W  $4f_{7/2}$  and W  $4f_{5/2}$ , respectively.<sup>2</sup> For the Co2p spectrum of  $\text{Co}^{\text{II/III}}_2\text{-SiW}_{12}$ , it is apparent that two main peaks are located at 780.68 eV and 796.84 eV, and meanwhile there are two dithered satellite peaks at 786.69 eV and 802.94 eV (Fig. S8). The peaks of Co  $2p_{3/2}$  and Co  $2p_{1/2}$  in the Co 2p spectrum can be fitted to two peaks after Gaussian fitting. The fitted peaks of 780.28 eV and 795.50 eV are attributed to  $\text{Co}^{2+}$ , and the fitted peaks of 781.90 eV and 797.90 eV belong to  $\text{Co}^{3+}$ .<sup>3</sup> In all, the results of IR, PXRD and XPS characterizations are consistent with the analysis of single crystal X-ray diffraction.

## VII. Experimental process on photocatalytic hydrogen evolution

All photocatalytic experiments were conducted in a 27 mL Pyrex reaction vessel via a photocatalytic  $\text{H}_2$  evolution activity evaluation system, where the photoreaction temperature was kept at a constant temperature (4 °C) with circulating water through a thermostat. The gas circulation was swept by high purity  $\text{N}_2$  before illumination. For each experiment, the 5 mg photocatalyst was dispersed in 20 mL of 10 vol % triethylamine (TEA) and 50 vol% acetone aqueous solution under a 500 W Xe lamp (without cut-off filter). Place the reactor on a stirrer and continue to stir and irradiate for 3h, enabling the photocatalyst to maintain a uniform dispersion state and uniform illumination during the experimental process. The amount of hydrogen evolved was determined at an interval of 1 h with gas chromatography.



## Section 2 Supplementary structural figures and characterization

### information

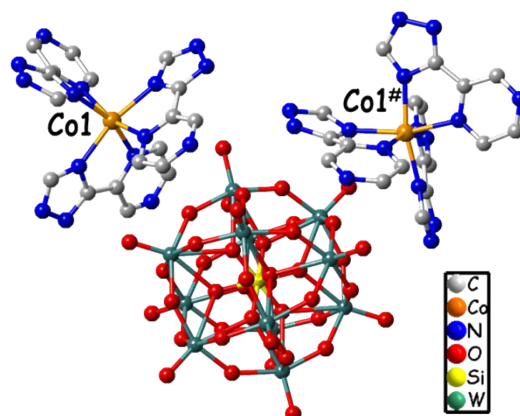

**Figure S2.** View of the basic crystallographic unit in  $\text{Co}^{\text{III}}_2\text{-SiW}_{12}$  (All H atoms and lattice water molecules are omitted for clarity). (Symmetry code: # = 2-x, y, 0.5-z).

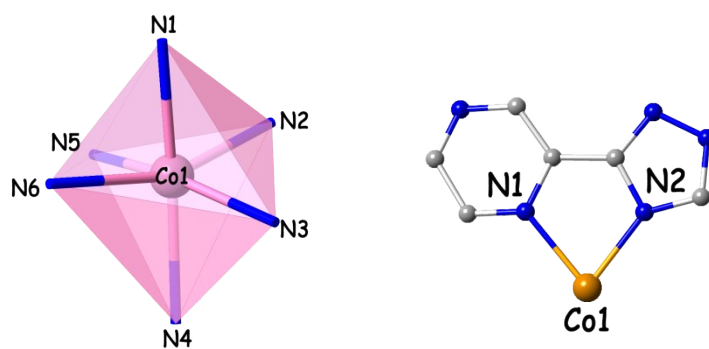

**Figure S3.** The coordination modes of crystallographically independent Co cation and pta ligand in  $\text{Co}^{\text{III}}_2\text{-SiW}_{12}$ .

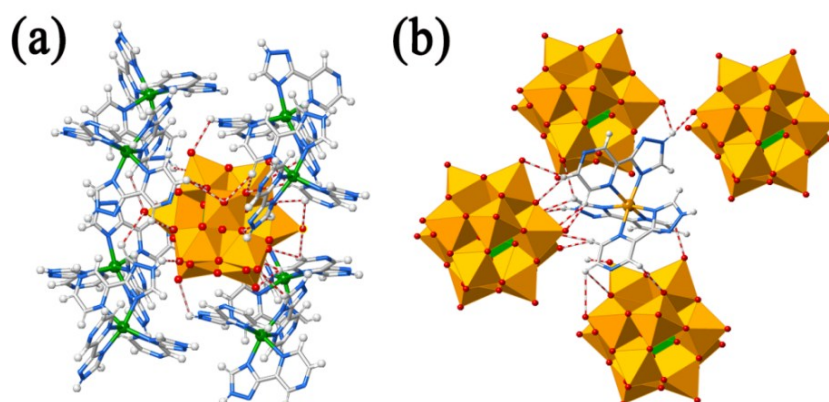

**Figure S4.** Ball and stick views of the coordination environments of (a)  $\text{SiW}_{12}$  cluster; (b)  $\{\text{Co}(\text{pzta})_3\}$  fragment in  $\text{Co}^{\text{III}}_2\text{-SiW}_{12}$ .

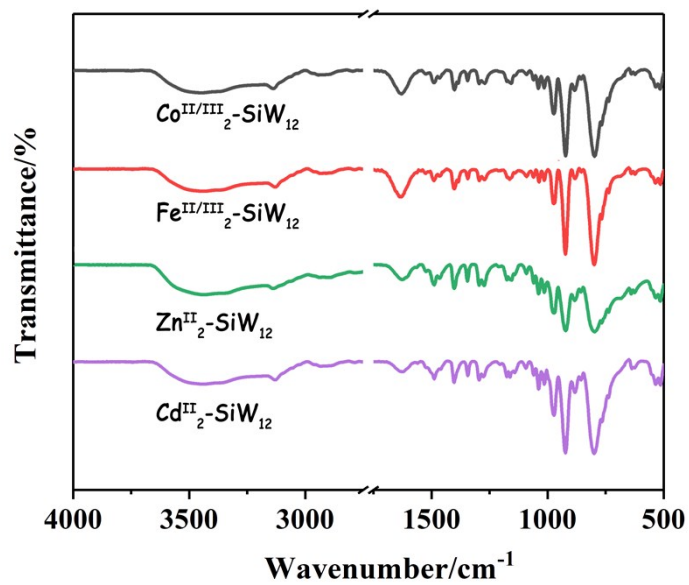

Fig. S5. The IR spectra of  $\text{Co}^{\text{II/III}}_2\text{-SiW}_{12}$ ,  $\text{Fe}^{\text{II/III}}_2\text{-SiW}_{12}$ ,  $\text{Zn}^{\text{II}}_2\text{-SiW}_{12}$  and  $\text{Cd}^{\text{II}}_2\text{-SiW}_{12}$ .

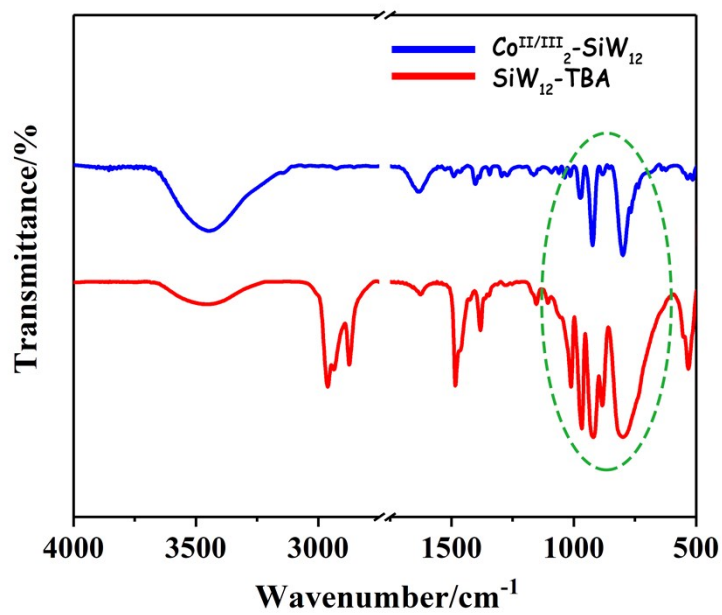

Fig. S6. The IR spectra of  $\text{Co}^{\text{II/III}}_2\text{-SiW}_{12}$  and  $\text{SiW}_{12}\text{-TBA}$ .

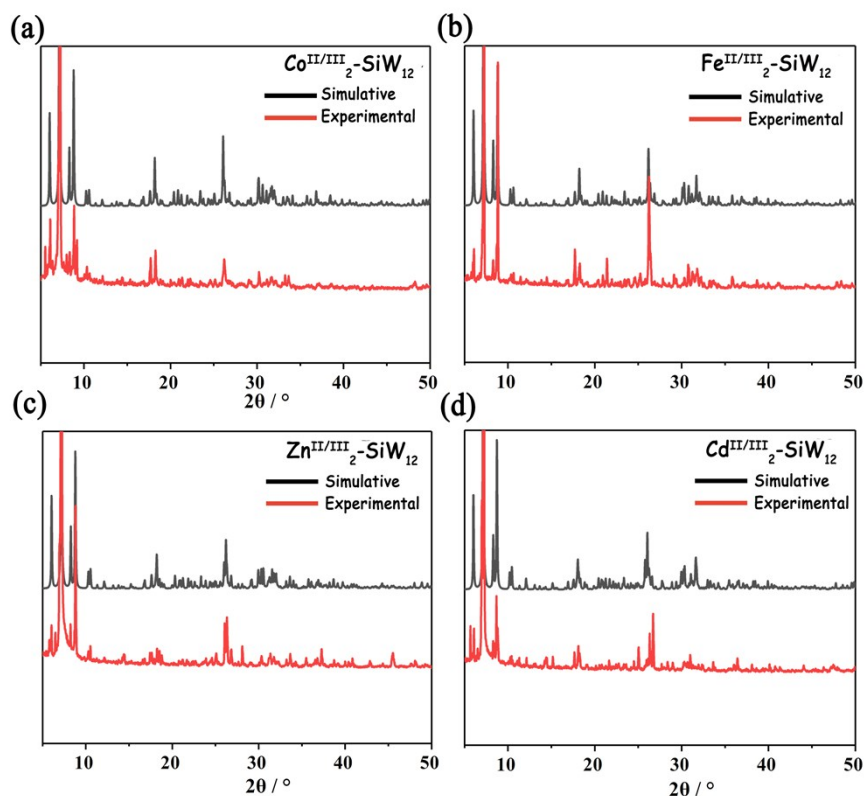

**Fig. S7.** Stimulative (black) and experimental (red) PXRD patterns for  $\text{Co}^{\text{II/III}}_2\text{-SiW}_{12}$ ,  $\text{Fe}^{\text{II/III}}_2\text{-SiW}_{12}$ ,  $\text{Zn}^{\text{II}}_2\text{-SiW}_{12}$  and  $\text{Cd}^{\text{II}}_2\text{-SiW}_{12}$ .

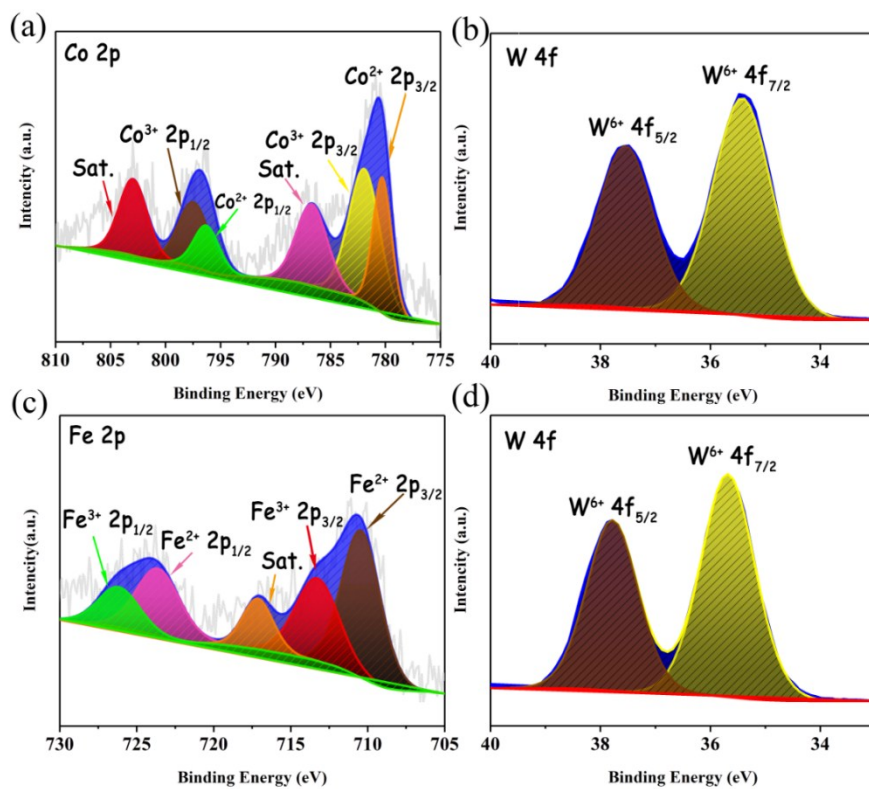

**Fig. S8.** (a-b) Co 2p and W 4f XPS spectra of  $\text{Co}^{\text{II/III}}_2\text{-SiW}_{12}$ , (c-d) Fe 2p and W 4f XPS spectra of  $\text{Fe}^{\text{II/III}}_2\text{-SiW}_{12}$ .

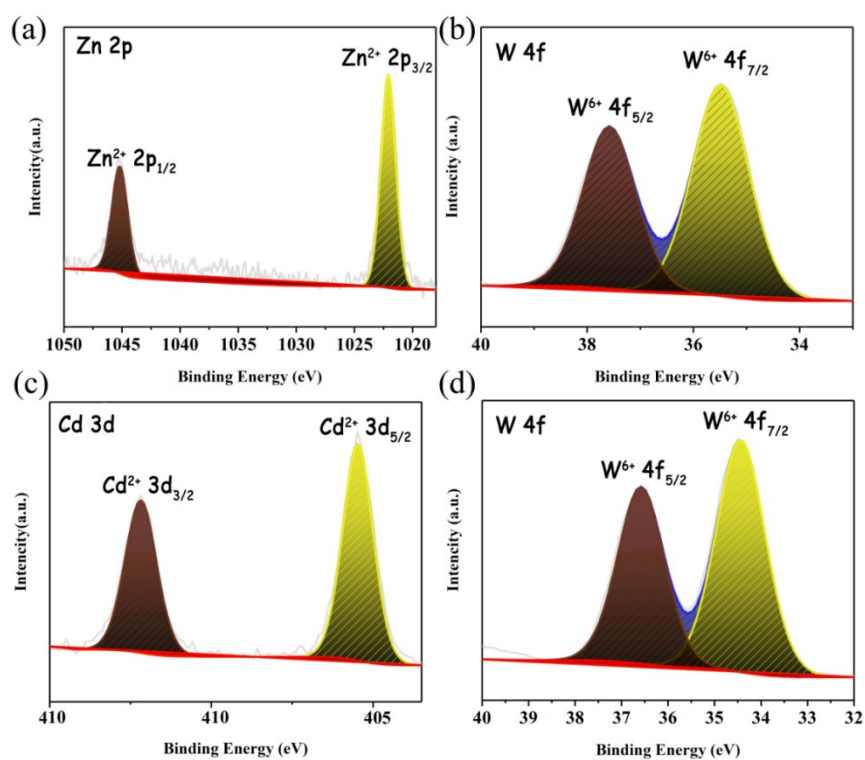

**Fig. S9.** (a-b) Zn 2p and W 4f XPS spectra of  $\text{Zn}^{\text{II}}_2\text{-SiW}_{12}$ , (c-d) Cd 3d and W 4f XPS spectra of  $\text{Cd}^{\text{II}}_2\text{-SiW}_{12}$ .

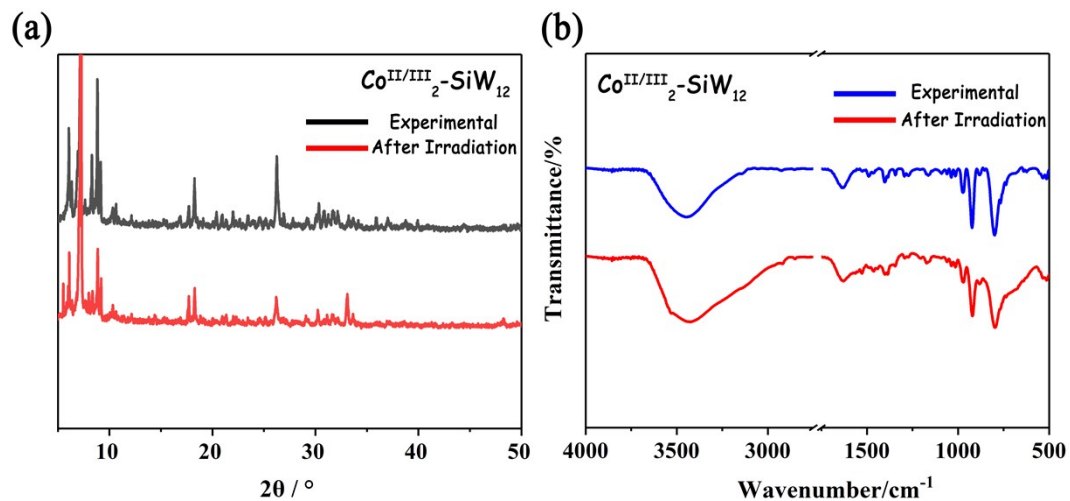

**Fig. S10.** (a)  $\text{Co}^{\text{II/III}}_2\text{-SiW}_{12}$  PXRD patterns of the experimental synthesis (black), and the catalyst after reactions (red); (b) The IR spectrum of  $\text{Co}^{\text{II/III}}_2\text{-SiW}_{12}$  before and after reactions.

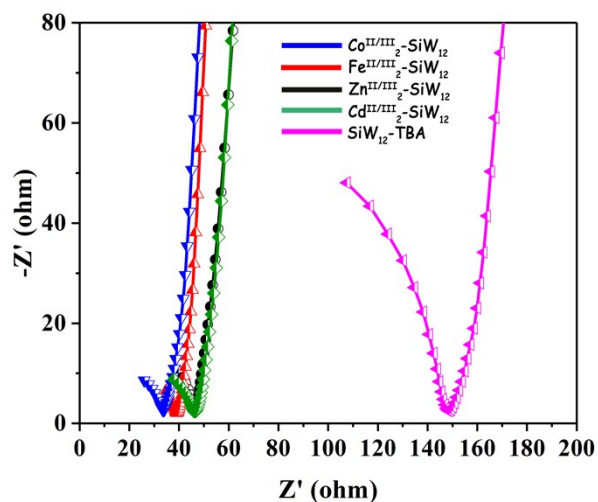

Fig. S11. EIS Nyquist plots of title compounds.

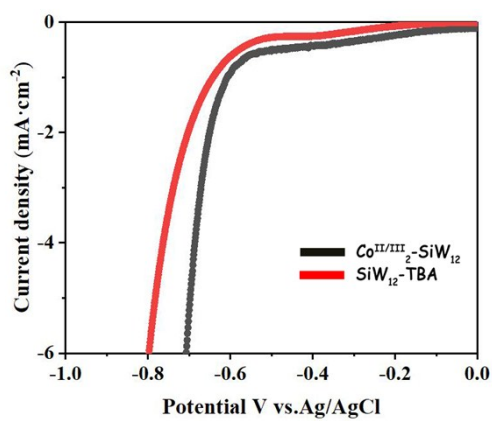

Fig. S12. Linear sweep voltammetry (LSV) curves of  $\text{Co}^{\text{II/III}}_2\text{-SiW}_{12}$  and  $\text{SiW}_{12}\text{-TBA}$ .

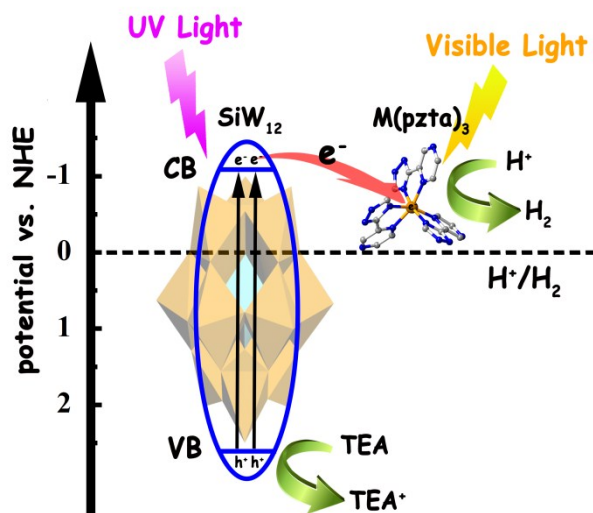

Fig. S13. The proposed mechanism of the photocatalytic reaction.

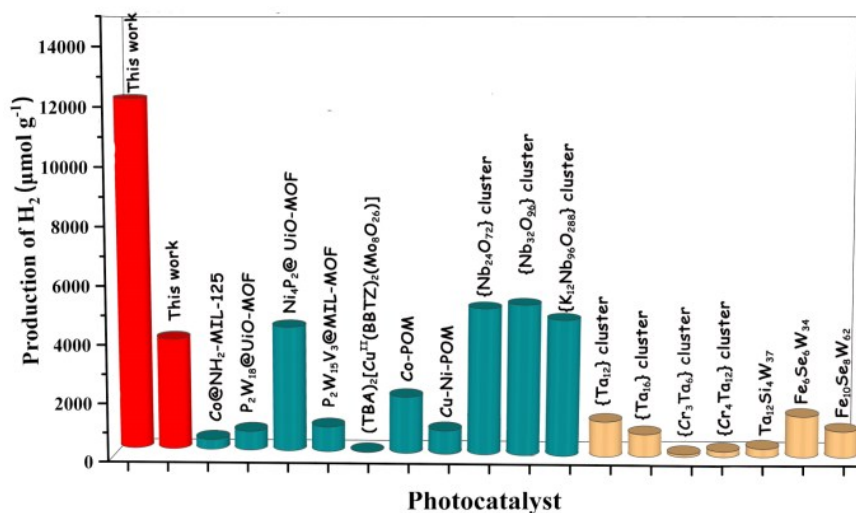

Fig. S14. Comparison of POM-photocatalysts on H<sub>2</sub> production.

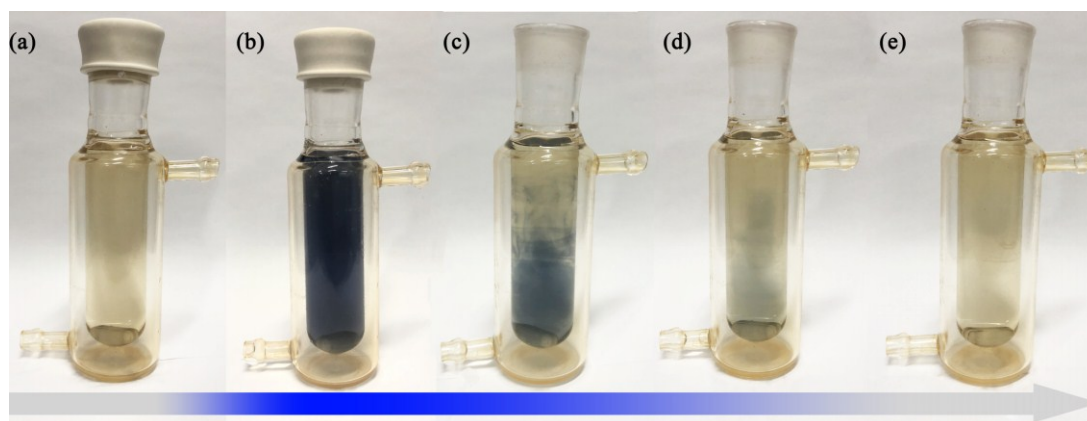

Fig. S15. Optical image: (a) Co<sup>II/III</sup><sub>2</sub>-SiW<sub>12</sub> photocatalytic system solution before irradiation. (b) heteropolyblue (HPB) of Co<sup>II/III</sup><sub>2</sub>-SiW<sub>12</sub> photocatalytic system solution after irradiation. (c-e) HPB turn to HPA of Co<sup>II/III</sup><sub>2</sub>-SiW<sub>12</sub> photocatalytic system solution after expose O<sub>2</sub>.

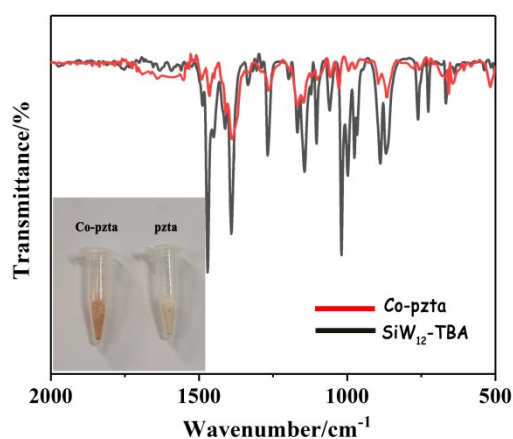

Fig. S16. IR spectra of the pzta ligand and Co-pzta compound. (inset: optics images of corresponding pzta ligand and Co-pzta); (right)

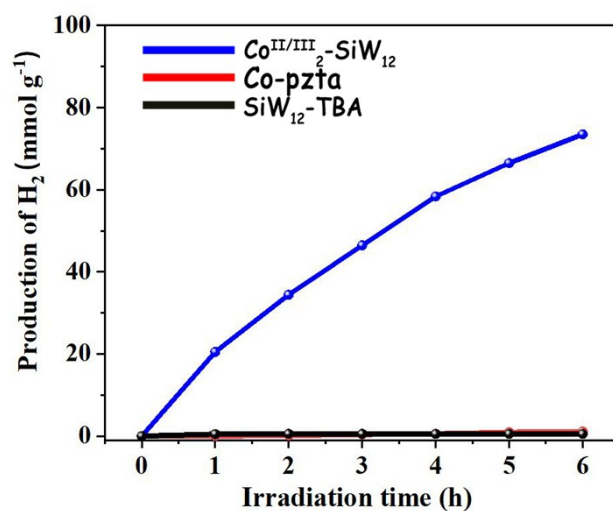

Fig. S17. The photocatalytic H<sub>2</sub> evolution activities of Co<sup>II/III</sup><sub>2</sub>-SiW<sub>12</sub>, Co-pzta and SiW<sub>12</sub>-TBA.

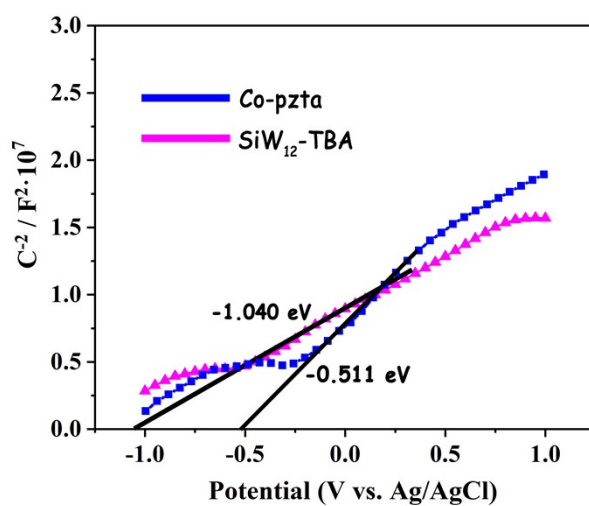

Fig. S18. Mott-Schottky plots of Co-pzta complex and SiW<sub>12</sub>-TBA.

### Section 3 Some detailed comparisons and summaries

**Table S2.** Summary of parallel experiments and optimum experimental conditions

| Catalyst                                                | Amount (mg) | Light ( $\lambda$ /nm) | Electron donor                      | H <sub>2</sub> production ( $\mu\text{mol g}^{-1} \text{h}^{-1}$ ) |
|---------------------------------------------------------|-------------|------------------------|-------------------------------------|--------------------------------------------------------------------|
| <b>Co<sup>II/III</sup><sub>2</sub>-SiW<sub>12</sub></b> | 5           | >190                   | TEA (2ml)                           | 12245.59                                                           |
| <b>Co<sup>II/III</sup><sub>2</sub>-SiW<sub>12</sub></b> | 5           | >190                   | TEA (4ml)                           | 4723.57                                                            |
| <b>Co<sup>II/III</sup><sub>2</sub>-SiW<sub>12</sub></b> | 5           | >190                   | TEA (no acetone)                    | trace                                                              |
| <b>Co<sup>II/III</sup><sub>2</sub>-SiW<sub>12</sub></b> | 5           | >190                   | TEOA (2ml)                          | 187.12                                                             |
| <b>Co<sup>II/III</sup><sub>2</sub>-SiW<sub>12</sub></b> | 5           | >190                   | CH <sub>3</sub> OH (5ml)            | 184.47                                                             |
| <b>Co<sup>II/III</sup><sub>2</sub>-SiW<sub>12</sub></b> | 5           | >190                   | Lactic Acid (5ml)                   | trace                                                              |
| <b>Co<sup>II/III</sup><sub>2</sub>-SiW<sub>12</sub></b> | 5           | >190                   | L-Ascorbic Acid Sodium Salt (0.05g) | trace                                                              |
| <b>Co-pzta</b>                                          | 5           | >190                   | TEA (2ml)                           | 178.49                                                             |
| <b>Co<sup>II/III</sup><sub>2</sub>-SiW<sub>12</sub></b> | 5           | >400                   | TEA (2ml)                           | no                                                                 |
| <b>Co<sup>II/III</sup><sub>2</sub>-SiW<sub>12</sub></b> | 5           | <400                   | TEA (2ml)                           | trace                                                              |
| <b>Fe<sup>II/III</sup><sub>2</sub>-SiW<sub>12</sub></b> | 5           | >190                   | TEA (2ml)                           | 3912.78                                                            |
| <b>Zn<sup>II</sup><sub>2</sub>-SiW<sub>12</sub></b>     | 5           | >190                   | TEA (2ml)                           | 121.45                                                             |
| <b>Cd<sup>II</sup><sub>2</sub>-SiW<sub>12</sub></b>     | 5           | >190                   | TEA (2ml)                           | 112.91                                                             |
| <b>SiW<sub>12</sub>-TBA</b>                             | 5           | >190                   | TEA (2ml)                           | 86.31                                                              |
| <b>SiW<sub>12</sub>-TBA</b>                             | 5           | >400                   | TEA (2ml)                           | no                                                                 |
| <b>SiW<sub>12</sub>-TBA</b>                             | 5           | <400                   | TEA (2ml)                           | trace                                                              |
| No catalyst                                             | -           | >190                   | TEA (2ml)                           | no                                                                 |
| No light                                                | 5           | -                      | TEA (2ml)                           | no                                                                 |
| No donor                                                | 5           | >190                   | -                                   | no                                                                 |



**Table S3.** Summary of H<sub>2</sub> evolution activity of typical photocatalysts: I typical POM-based metal-organic photocatalysts (green background); II typical POMs and noble metals composite photocatalysts (orange background); III Other typical excellent photocatalysts (blue background); IV the photocatalysts reported by this work (red background).

| Catalyst                                                                                              | Co-catalyst                                | SED                | Illumination (nm) | Activity, ( $\mu\text{molg}^{-1}\text{h}^{-1}$ ) | Ref                                                          |
|-------------------------------------------------------------------------------------------------------|--------------------------------------------|--------------------|-------------------|--------------------------------------------------|--------------------------------------------------------------|
| <b>I typical POM-based metal-organic photocatalysts</b>                                               |                                            |                    |                   |                                                  |                                                              |
| <b>Co@NH<sub>2</sub>-MIL-125(Ti)<sup>4</sup></b>                                                      | Co <sup>III</sup> Br <sub>2</sub> LH       | TEA                | $\lambda > 408$   | 350                                              | <i>Energ. Environ. Sci.</i> , 2015, 8, 364-375               |
| <b>P<sub>2</sub>W<sub>18</sub>@UiO-MOF<sup>5</sup></b>                                                | POM                                        | Methanol           | $\lambda > 400$   | 669                                              | <i>J. Am. Chem. Soc.</i> , 2015, 137, 9, 3197-3200           |
| <b>Ni<sub>4</sub>P<sub>2</sub>@ UiO-MOF<sup>6</sup></b>                                               | POM                                        | Methanol           | $\lambda > 400$   | 4400                                             | <i>Angew. Chem. Int.</i> , 2016, 23, 6411-6416               |
| <b>P<sub>2</sub>W<sub>15</sub>V<sub>3</sub>@MIL-MOF<sup>7</sup></b>                                   | POM                                        | TEOA               | $\lambda > 400$   | 883                                              | <i>Appl. Catal. B-Environ.</i> , 2018, 224, 46-52            |
| <b>(TBA)<sub>2</sub>[Cu<sup>II</sup>(BBTZ)<sub>2</sub>(Mo<sub>8</sub>O<sub>26</sub>)]<sup>8</sup></b> | Pt                                         | Methanol           | $\lambda < 400$   | 7.8                                              | <i>Angew. Chem. Int.</i> , 2012, 6, 7985-7989                |
| <b>Co-POM<sup>9</sup></b>                                                                             | Co                                         | TEA                | $\lambda > 380$   | 2000                                             | <i>ACS Appl. Mater. Interfaces.</i> , 2018, 10, 13462-13469. |
| <b>Cu-Ni-POM<sup>10</sup></b>                                                                         | Cu/Ni                                      | TEA                | $\lambda > 380$   | 824                                              | <i>Chem. Commun.</i> , 2019, 55, 3805-3808                   |
| <b>{Nb<sub>24</sub>O<sub>72</sub>} Cluster<sup>11</sup></b>                                           | Co <sup>III</sup> (dmgH) <sub>2</sub> pyCl | TEA                | $\lambda = 365$   | 5161.4                                           | <i>J. Am. Chem. Soc.</i> 2012, 134, 14004-14010.             |
| <b>{Nb<sub>32</sub>O<sub>96</sub>} cluster<sup>11</sup></b>                                           | Co <sup>III</sup> (dmgH) <sub>2</sub> pyCl | TEA                | $\lambda = 365$   | 5312.5                                           | <i>J. Am. Chem. Soc.</i> 2012, 134, 14004-14010.             |
| <b>{K<sub>12</sub>Nb<sub>96</sub>O<sub>288</sub>} cluster<sup>11</sup></b>                            | Co <sup>III</sup> (dmgH) <sub>2</sub> pyCl | TEA                | $\lambda = 365$   | 4804.1                                           | <i>J. Am. Chem. Soc.</i> 2012, 134, 14004-14010.             |
| <b>II typical POMs and noble metals composite photocatalysts</b>                                      |                                            |                    |                   |                                                  |                                                              |
| <b>{Ta<sub>12</sub>} cluster<sup>12</sup></b>                                                         | Pt                                         | CH <sub>3</sub> OH | $\lambda = 365$   | 1250                                             | <i>J. Am. Chem. Soc.</i> 2012, 134, 19716-19721.             |
| <b>{Ta<sub>16</sub>} cluster<sup>12</sup></b>                                                         | Pt                                         | CH <sub>3</sub> OH | $\lambda = 365$   | 803                                              | <i>J. Am. Chem. Soc.</i> 2012, 134, 19716-19721.             |
| <b>{Cr<sub>3</sub>Ta<sub>6</sub>} cluster<sup>13</sup></b>                                            | Pt                                         | CH <sub>3</sub> OH | 500 Xe            | 89.2                                             | <i>J. Mater. Chem. A</i> , 2017,5, 22970-22974.              |
| <b>{Cr<sub>4</sub>Ta<sub>12</sub>} cluster<sup>13</sup></b>                                           | Pt                                         | CH <sub>3</sub> OH | 500 Xe            | 198.30                                           | <i>J. Mater. Chem. A</i> , 2017,5, 22970-22974.              |
| <b>{Ta<sub>12</sub>Si<sub>4</sub>W<sub>37</sub>}<sup>14</sup></b>                                     | Pt                                         | CH <sub>3</sub> OH | 500 Xe lamp       | 301.2                                            | <i>Dalton Trans.</i> , 2017,46, 10177-10180                  |
| <b>{Fe<sub>6</sub>Se<sub>6</sub>W<sub>34</sub>}<sup>15</sup></b>                                      | Fe <sup>III</sup>                          | CH <sub>3</sub> OH | 500 Hg lamp       | 1447.5                                           | <i>Chem. Commun.</i> , 2014,50, 13265-13267.                 |
| <b>{Fe<sub>10</sub>Se<sub>8</sub>W<sub>62</sub>}<sup>15</sup></b>                                     | Fe <sup>III</sup>                          | CH <sub>3</sub> OH | 500 Hg            | 925.0                                            | <i>Chem. Commun.</i> , 2014,50, 13265-                       |

|                                                             |                       |                                                       |                 |                 |                                                       |
|-------------------------------------------------------------|-----------------------|-------------------------------------------------------|-----------------|-----------------|-------------------------------------------------------|
|                                                             |                       |                                                       | lamp            |                 | 13267.                                                |
| <b>III Other typical excellent photocatalysts</b>           |                       |                                                       |                 |                 |                                                       |
| <b>TFPT-COF<sup>16</sup></b>                                | Pt                    | TEOA                                                  | $\lambda > 420$ | 1970            | <i>Nat. Commun.</i> , 2015, 6, 8508.                  |
| <b>g-C<sub>3</sub>N<sub>4</sub> nanosheets<sup>17</sup></b> | Pt                    | TEOA                                                  | $\lambda > 420$ | 1860            | <i>Adv. Mater.</i> , 2013, 25, 2452-2456.             |
| <b>g-C<sub>3</sub>N<sub>4</sub><sup>18</sup></b>            | MoS <sub>2</sub>      | Lactic acid                                           | $\lambda > 420$ | 1030            | <i>Angew. Chem. Int. Ed.</i> , 2013, 52, 3621-3625.   |
| <b>MOF-5<sup>19</sup></b>                                   | Ni                    | TEOA                                                  | $\lambda > 420$ | 3022            | <i>Appl. Catal. B- Environ.</i> , 2016, 190, 12-25.   |
| <b>Au@CdS/MIL-101<sup>20</sup></b>                          | Au                    | Na <sub>2</sub> S and Na <sub>2</sub> SO <sub>3</sub> | $\lambda > 420$ | 2500            | <i>Appl. Catal. B- Environ.</i> , 2016, 185, 307-314. |
| <b>IV the photocatalysts reported by this work</b>          |                       |                                                       |                 |                 |                                                       |
| <b>Co<sup>II/III</sup><sub>2</sub>-SiW<sub>12</sub></b>     | Co(pzta) <sub>3</sub> | TEA                                                   | $\lambda > 190$ | <b>12245.59</b> | <b>This work</b>                                      |
| <b>Fe<sup>II/III</sup><sub>2</sub>-SiW<sub>12</sub></b>     | Fe(pzta) <sub>3</sub> | TEA                                                   | $\lambda > 190$ | <b>3912.78</b>  | <b>This work</b>                                      |

## References

- 1 D. F. Chai, Y. Hou, K. P. O'Halloran, H. J. Pang, H. Y. Ma, G. N. Wang, X. M. Wang, *ChemElectroChem*, 2018, **5**, 3443-3450.
- 2 D. F. Chai, C.J. Gómez-García, B. N. Li, H. J. Pang, H. Y. Ma, *Chem. Eng. J.*, 2019, **373**, 587-597.
- 3 J. H. Zheng, L. Zhang, *Appl. Catal. B-Environ.*, 2018, **237**, 1-8.
- 4 M. A. Nasalevich, R. Becker, E. V. Ramos-Fernandez, S. Castellanos, S. L. Veber, M. V. Fedin, F. Kapteijn, J. N. H. Reek, J. I. van der Vlugt and J. Gascon, *Energy Environ. Sci.*, 2015, **8**, 364-375.
- 5 Z. M. Zhang, T. Zhang, C. Wang, Z. K. Lin, L. S. Long, and W. B. Lin, *J. Am. Chem. Soc.* 2015, **137**, **9**, 3197-3200.
- 6 J. K. Xiang, Z. K. Lin, Z. M. Zhang, T. Zhang, W. B. Lin, *Angew. Chem. Int.*, 2016, **23**, 6411-6416.
- 7 H. Li, S. Yao, H. L. Wu, J. Y. Qu, Z. M. Zhang, T. B. Lu, W. B. Lin, E. B. Wang, *Appl. Catal. B-Environ.*, 2018, **224**, 46-52.
- 8 H. Fu, C. Qin, Y. Lu, Z. M. Zhang, Y. G. Li, Z. M. Su, W. L. Li, E. B. Wang, *Angew. Chem. Int.*, 2012, **6**, 7985-7989
- 9 W. L. Sun, B. W. An, B. Qi, T. Liu, M. Jin, and C.Y. Duan, *ACS Appl. Mater. Interfaces.*, 2018, **10**, 13462-13469.
- 10 W. L. Sun, C. He, T. Liu and C.Y. Duan, *Chem. Commun.*, 2019, **55**, 3805-3808.
- 11 P. Huang, C. Qin, Z.M. Su, Y. Xing, X.L. Wang, K.Z. Shao, Y.Q. Lan, E. B. Wang, *J. Am. Chem. Soc.* 2012, **134**, 14004-14010.
- 12 S. J. Li, S. M. Liu, S. X. Liu, Y. W. Liu and J. H. Ye, *J. Am. Chem. Soc.*, 2012, **134**, 19716-19721.
- 13 P. Huang, X. J. Wang, J. J. Qi, X. L. Wang, M. Huang, H. Y. Wu, C. Qin and Z. M. Su, *J. Mater. Chem. A*, 2017, **5**, 22970-22974.
- 14 P. Huang, H. Y. Wu, M. Huang, M. Du, C. Qin, X. L. Wang, and Z. M. Su, *Dalton Trans.*, 2017, **46**, 10177-10180.
- 15 W. C. Chen, C. Qin, X. L. Wang, Y. G. Li, H. Y. Zang, Y. Q. Jiao, P. Huang, K. Z. Shao, Z. M. Su and E.B. Wang, *Chem. Commun.*, 2014, **50**, 13265-13267.
- 16 V. S. Vyas, F. Haase, L. Stegbauer, G. Savasci, F. Podjaski, C. Ochsenfeld and B. V. Lotsch, *Nat. Commun.*, 2015, **6**, 8508.
- 17 S. Yang, Y. Gong, J. Zhang, L. Zhan, L. Ma, Z. Fang, R. Vajtai, X. Wang and P. M. Ajayan, *Adv. Mater.*, 2013, **25**, 2452-2456.
- 18 Y. Hou, A. B. Laursen, J. Zhang, G. Zhang, Y. Zhu, X. Wang, S. Dahl and I. Chorkendorff, *Angew. Chem. Int. Ed.*, 2013, **52**, 3621-3625.
- 19 W. L. Zhen, J. T. Ma, G. X. Lu, *Appl. Catal B.*, 2016, **190**, 12-25.
- 20 Y. J. Wang, Y. N. Zhang, Z. Q. Jiang, G. Y. Jiang, Z. Zhao, Q. H. Wu, Y. Liu, Q. Xu, A. J. Duan, C. M. Xu, *Appl. Catal B.*, 2016, **185**, 307-314.
